# Supplementary material for: Developing Eco-Friendly 3D-Printing Composite Filament: Utilizing Palm Midrib to Reinforce High-Density Polyethylene Matrix in Design Applications
Source: MDPI journal article supplement (doi:10.3390/polym16081135), 2024-04-18
Supplement: s1 [file s1]

# Developing Eco-Friendly 3D-Printing Composite Filament: Utilizing Palm Midrib to Reinforce High-Density Polyethylene Matrix in Design Applications

Ahmed El Shakhs <sup>1,\*</sup>, Noha A. Elessawy <sup>2,\*</sup>, Mohamed Fahmy El-Saka <sup>3</sup>, Gasser E. Hassan <sup>2,4</sup> and May A. Malek Ali <sup>5</sup>

<sup>1</sup> Faculty of Architecture and Design, College of Engineering, Abu Dhabi University, Abu Dhabi 59911, United Arab Emirates

<sup>2</sup> Computer Based Engineering Applications Department, Informatics Research Institute, City of Scientific Research and Technological Applications (SRTA-City), New Borg El-Arab City 21934, Alexandria, Egypt; g\_hassan@srtacity.sci.eg

<sup>3</sup> Central Laboratory for Biochemical Analysis, City of Scientific Research and Technological Applications (SRTA-City), New Borg El-Arab City 21934, Alexandria, Egypt; m\_fahmy@srtacity.sci.eg

<sup>4</sup> Faculty of Industrial and Energy Technology, Borg Al Arab Technological University, New Borg El-Arab City 21934, Alexandria, Egypt

<sup>5</sup> Interior Architecture Department, Faculty of Fine Arts, Alexandria University, El-Shatby 21526, Alexandria, Egypt; may.ali@alexu.edu.eg

\* Correspondence: ahmed.elshakhs@adu.ac.ae (A.E.S.); nony\_essawy@yahoo.com (N.A.E.)

**Table S1:** Particle size distribution table

| Diam/μm     | Diff% | Cum%  | Diam/μm     | Diff% | Cum% | Diam/μm     | Diff% | Cum% | Diam/μm     | Diff% | Cum% |
|-------------|-------|-------|-------------|-------|------|-------------|-------|------|-------------|-------|------|
| 0.020-0.022 | 0.00  | 0     | 0.379-0.427 | 0.00  | 100  | 7.211-8.112 | 0.00  | 100  | 136.9-154.0 | 0.00  | 100  |
| 0.022-0.025 | 0.00  | 0     | 0.427-0.480 | 0.00  | 100  | 8.112-9.126 | 0.00  | 100  | 154.0-173.2 | 0.00  | 100  |
| 0.025-0.028 | 0.00  | 0     | 0.480-0.540 | 0.00  | 100  | 9.126-10.26 | 0.00  | 100  | 173.2-194.9 | 0.00  | 100  |
| 0.028-0.032 | 0.00  | 0     | 0.540-0.608 | 0.00  | 100  | 10.26-11.54 | 0.00  | 100  | 194.9-219.3 | 0.00  | 100  |
| 0.032-0.036 | 0.00  | 0     | 0.608-0.684 | 0.00  | 100  | 11.54-12.99 | 0.00  | 100  | 219.3-246.7 | 0.00  | 100  |
| 0.036-0.040 | 0.00  | 0     | 0.684-0.769 | 0.00  | 100  | 12.99-14.61 | 0.00  | 100  | 246.7-277.5 | 0.00  | 100  |
| 0.040-0.045 | 0.00  | 0     | 0.769-0.865 | 0.00  | 100  | 14.61-16.44 | 0.00  | 100  | 277.5-312.2 | 0.00  | 100  |
| 0.045-0.051 | 0.00  | 0     | 0.865-0.974 | 0.00  | 100  | 16.44-18.48 | 0.00  | 100  | 312.2-351.2 | 0.00  | 100  |
| 0.051-0.057 | 15.93 | 15.93 | 0.974-1.095 | 0.00  | 100  | 18.48-20.80 | 0.00  | 100  | 351.2-395.1 | 0.00  | 100  |
| 0.057-0.064 | 24.08 | 40.01 | 1.095-1.232 | 0.00  | 100  | 20.80-23.40 | 0.00  | 100  | 395.1-444.5 | 0.00  | 100  |
| 0.064-0.073 | 22.92 | 62.93 | 1.232-1.386 | 0.00  | 100  | 23.40-26.33 | 0.00  | 100  | 444.5-500.0 | 0.00  | 100  |
| 0.073-0.082 | 16.46 | 79.39 | 1.386-1.560 | 0.00  | 100  | 26.33-29.62 | 0.00  | 100  | 500.0-562.5 | 0.00  | 100  |
| 0.082-0.092 | 13.64 | 93.03 | 1.560-1.755 | 0.00  | 100  | 29.62-33.32 | 0.00  | 100  | 562.5-632.8 | 0.00  | 100  |
| 0.092-0.103 | 6.97  | 100   | 1.755-1.974 | 0.00  | 100  | 33.32-37.49 | 0.00  | 100  | 632.8-711.9 | 0.00  | 100  |
| 0.103-0.116 | 0.00  | 100   | 1.974-2.221 | 0.00  | 100  | 37.49-42.17 | 0.00  | 100  | 711.9-800.9 | 0.00  | 100  |
| 0.116-0.131 | 0.00  | 100   | 2.221-2.498 | 0.00  | 100  | 42.17-47.44 | 0.00  | 100  | 800.9-900.9 | 0.00  | 100  |
| 0.131-0.148 | 0.00  | 100   | 2.498-2.811 | 0.00  | 100  | 47.44-53.37 | 0.00  | 100  | 900.9-1013  | 0.00  | 100  |
| 0.148-0.166 | 0.00  | 100   | 2.811-3.162 | 0.00  | 100  | 53.37-60.04 | 0.00  | 100  | 1013-1140   | 0.00  | 100  |
| 0.166-0.187 | 0.00  | 100   | 3.162-3.557 | 0.00  | 100  | 60.04-67.55 | 0.00  | 100  | 1140-1282   | 0.00  | 100  |
| 0.187-0.210 | 0.00  | 100   | 3.557-4.002 | 0.00  | 100  | 67.55-75.98 | 0.00  | 100  | 1282-1443   | 0.00  | 100  |
| 0.210-0.237 | 0.00  | 100   | 4.002-4.502 | 0.00  | 100  | 75.98-85.49 | 0.00  | 100  | 1443-1623   | 0.00  | 100  |
| 0.237-0.266 | 0.00  | 100   | 4.502-5.065 | 0.00  | 100  | 85.49-96.17 | 0.00  | 100  | 1623-1826   | 0.00  | 100  |
| 0.266-0.300 | 0.00  | 100   | 5.065-5.698 | 0.00  | 100  | 96.17-108.1 | 0.00  | 100  | 1826-2054   | 0.00  | 100  |
| 0.300-0.337 | 0.00  | 100   | 5.698-6.410 | 0.00  | 100  | 108.1-121.7 | 0.00  | 100  | 2054-2311   | 0.00  | 100  |
| 0.337-0.379 | 0.00  | 100   | 6.410-7.211 | 0.00  | 100  | 121.7-136.9 | 0.00  | 100  | 2311-2600   | 0.00  | 100  |

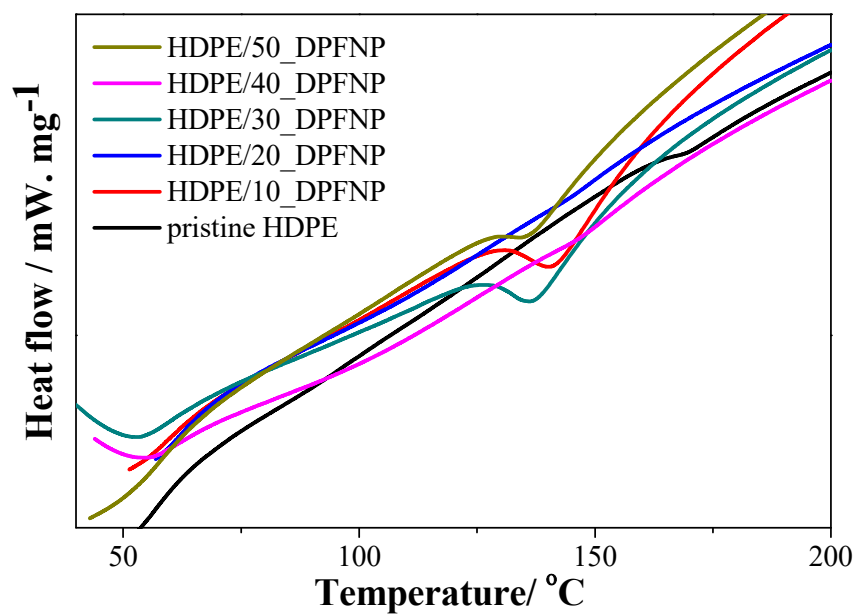

(a)

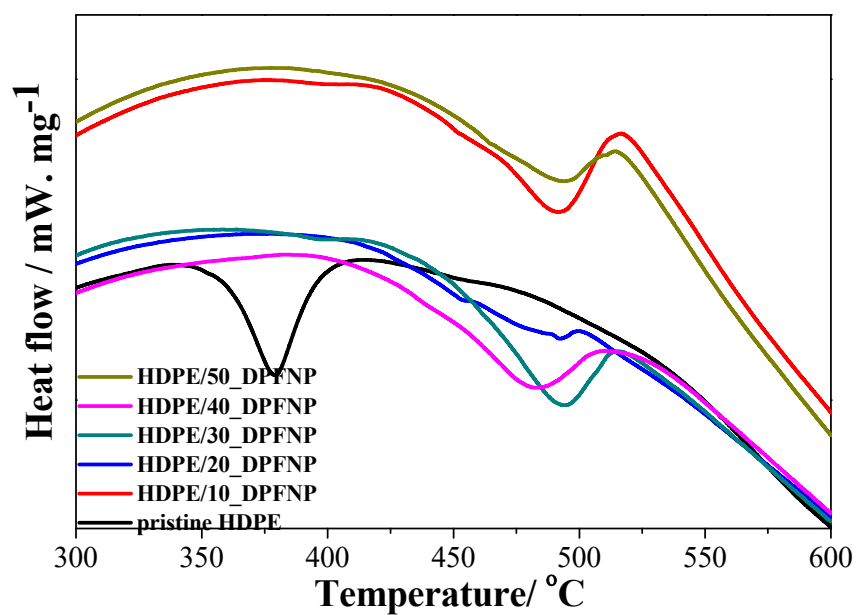

(b)

**Figure S1:** DSC curve for pristine HDPE and HDPE/DPFNP composites at different temperature range (a) at temperature range between 40-200°C and (b) at temperature range between 300-600°C.
